# Supplementary material for: Hemodynamic Responses Evoked by Neuronal Stimulation via Channelrhodopsin-2 Can Be Independent of Intracortical Glutamatergic Synaptic Transmission
Source: PubMed Central journal article supplement (PMC3254633; doi:10.1371/journal.pone.0029859), 2012-01-10
Supplement: pone.0029859.s001.pdf [file pone.0029859.s001.pdf]

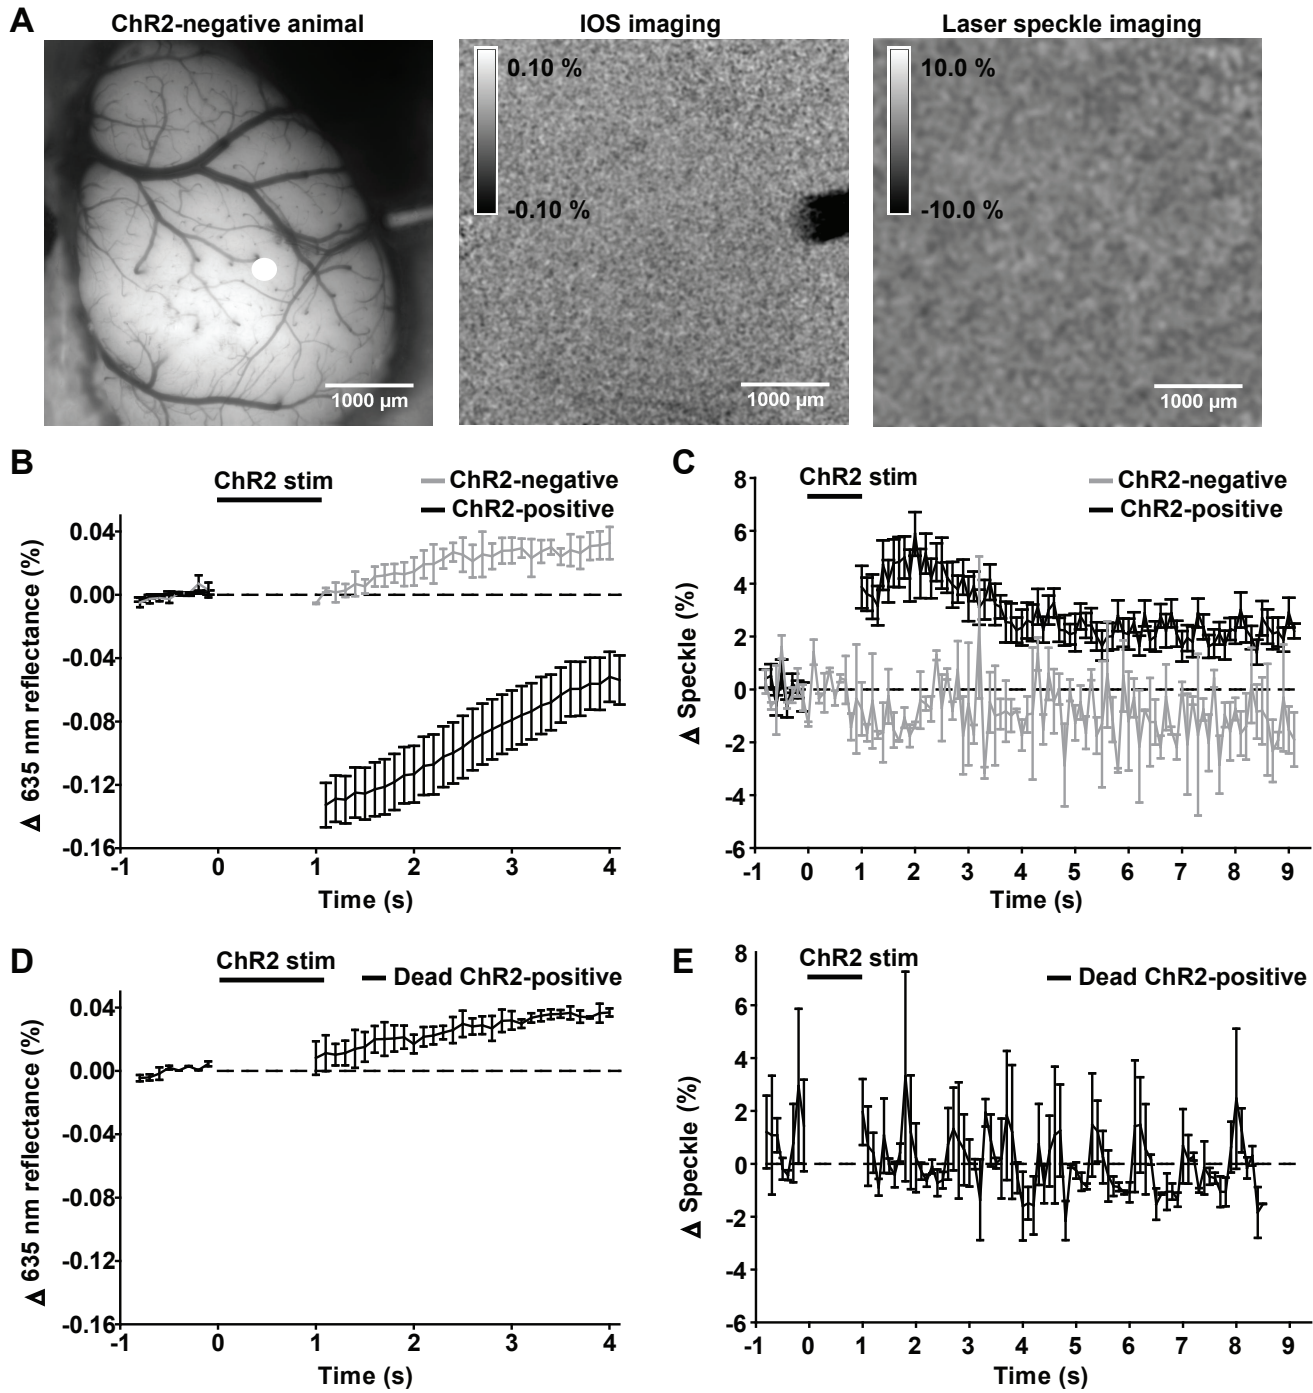

Figure S1
