# Supplementary material for: Hemodynamic Responses Evoked by Neuronal Stimulation via Channelrhodopsin-2 Can Be Independent of Intracortical Glutamatergic Synaptic Transmission
Source: PubMed Central journal article supplement (PMC3254633; doi:10.1371/journal.pone.0029859), 2012-01-10
Supplement: pone.0029859.s002.pdf [file pone.0029859.s002.pdf]

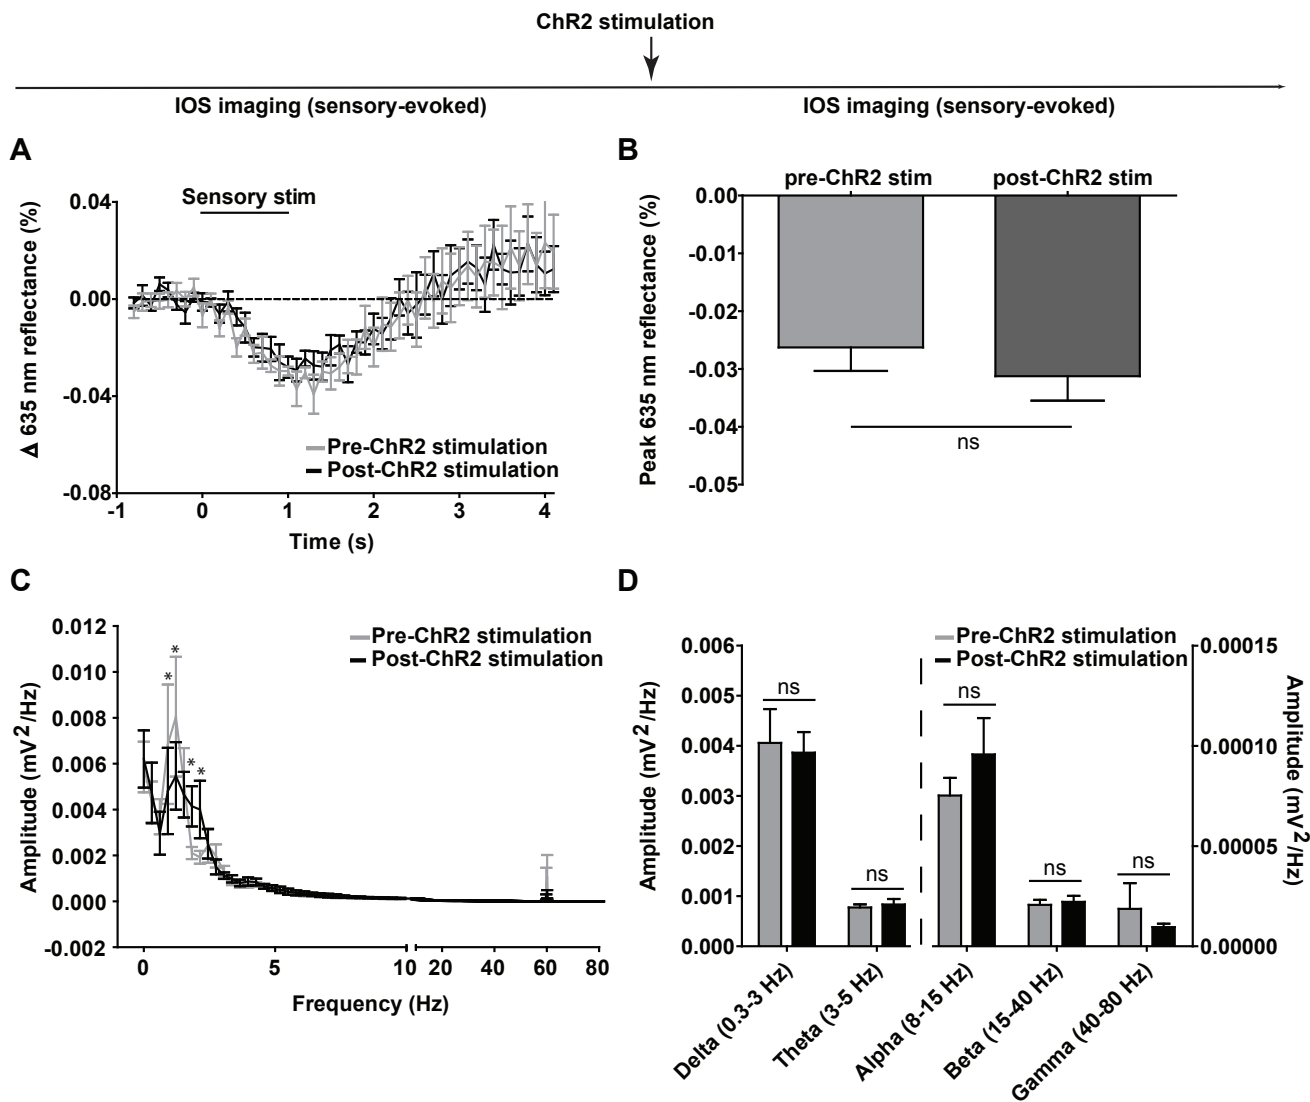

**E**  
Effect of ChR2 stimulation on heart rate and oxygen saturation.

|                              | Baseline          | ChR2 stimulation  |
|------------------------------|-------------------|-------------------|
| <b>Oxygen saturation (%)</b> |                   |                   |
| Mean ± SEM                   | 97.65 ± 0.94      | 98.61 ± 0.21      |
| Range                        | (95.22 - 99.67)   | (98.38 - 99.25)   |
| <b>Heart rate (bpm)</b>      |                   |                   |
| Mean ± SEM                   | 261.45 ± 20.40    | 258.39 ± 22.91    |
| Range                        | (211.46 - 309.37) | (206.44 - 301.49) |

Figure S2
