# Supplementary material for: Hemodynamic Responses Evoked by Neuronal Stimulation via Channelrhodopsin-2 Can Be Independent of Intracortical Glutamatergic Synaptic Transmission
Source: PubMed Central journal article supplement (PMC3254633; doi:10.1371/journal.pone.0029859), 2012-01-10
Supplement: pone.0029859.s003.pdf [file pone.0029859.s003.pdf]

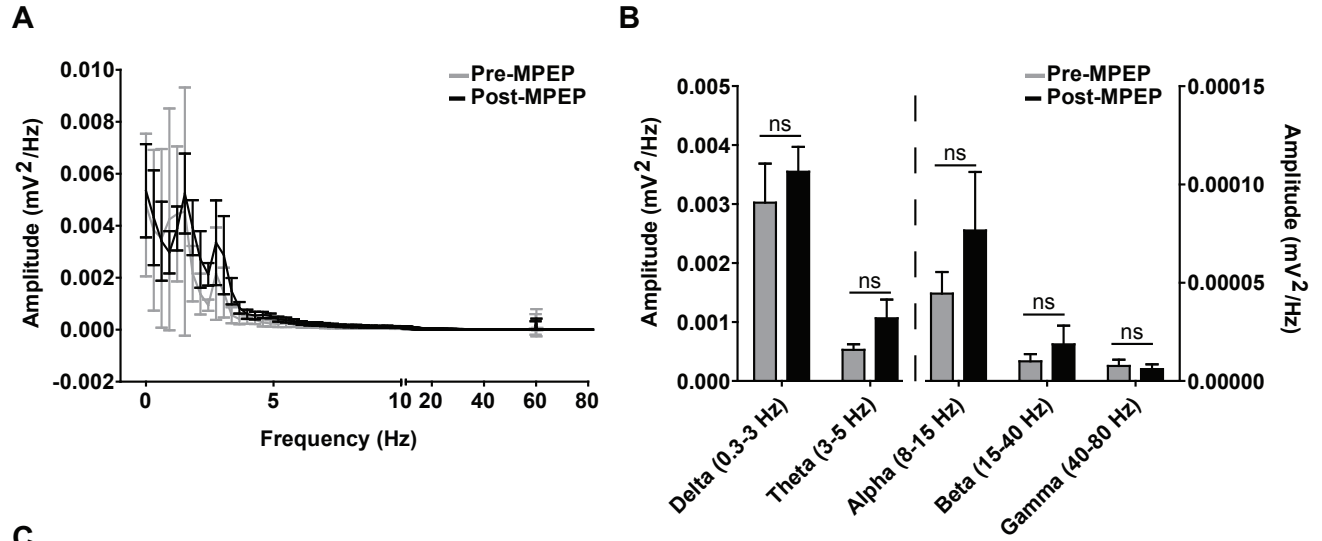

**C**  
Effect of MPEP on heart rate and oxygen saturation.

|                              | Pre-MPEP           | 0 min post-MPEP injection | 10 min post-MPEP injection |
|------------------------------|--------------------|---------------------------|----------------------------|
| <b>Oxygen saturation (%)</b> |                    |                           |                            |
| Mean $\pm$ SEM               | 99.38 $\pm$ 0.11   | 99.03 $\pm$ 0.22          | 98.92 $\pm$ 0.31           |
| Range                        | (99.25 - 99.60)    | (98.61 - 99.34)           | (98.30 - 99.31)            |
| <b>Heart rate (bpm)</b>      |                    |                           |                            |
| Mean $\pm$ SEM               | 242.02 $\pm$ 37.72 | 236.58 $\pm$ 10.36        | 272.56 $\pm$ 22.44         |
| Range                        | (188.25 - 314.73)  | (217.35 - 252.89)         | (244.20 - 316.86)          |

Figure S3
